# Supplementary material for: Epidemiological Trends of Dengue Disease in Mexico (2000–2011): A Systematic Literature Search and Analysis
Source: PubMed Central journal article supplement (PMC4222737; doi:10.1371/journal.pntd.0003158), 2014-11-06
Supplement: pntd.0003158.s002.pdf [file pntd.0003158.s002.pdf]

**Supplementary Table S2. Age distribution of uncomplicated dengue disease in Mexico.[19,29] Data shown are number cases (incidence per 100,000 population).**

| Year  | Age group (years) |                 |                 |                 |                 |                 |                   |                 |                 |                |                 |
|-------|-------------------|-----------------|-----------------|-----------------|-----------------|-----------------|-------------------|-----------------|-----------------|----------------|-----------------|
|       | <1                | 1-4             | 5-9             | 10-14           | 15-19           | 20-24           | 25-44             | 45-49           | 50-59           | 60-64          | ≥65             |
| 2000  | 9 (0.42)          | 54 (0.62)       | 206 (1.84)      | 233 (2.10)      | 213 (2.03)      | 144 (1.48)      | 580 (1.99)        | 81 (1.90)       | 112 (1.87)      | 27 (1.26)      | 54 (1.13)       |
| 2001* | (4.8)             |                 |                 | (5.7)           |                 | (5.1)           | (4.4)             |                 |                 | (1.5)          |                 |
| 2001  | 34 (1.62)         | 257 (3.01)      | 553 (4.98)      | 635 (5.72)      | 495 (4.66)      | 424 (4.34)      | 1460 (4.89)       | 216 (4.84)      | 325 (5.20)      | 92 (4.14)      | 147 (2.97)      |
| 2002  | 69 (3.34)         | 516 (6.12)      | 1664<br>(15.12) | 2260<br>(20.35) | 1732<br>(16.16) | 1184<br>(12.05) | 3746<br>(12.24)   | 638 (13.68)     | 754<br>(11.59)  | 250<br>(10.90) | 355 (6.90)      |
| 2003  | 27 (1.36)         | 90 (1.09)       | 334 (2.98)      | 726 (6.43)      | 655 (6.11)      | 500 (4.98)      | 1743 (5.60)       | 311 (6.17)      | 415 (5.99)      | 134 (5.59)     | 207 (3.96)      |
| 2004  | 36 (1.84)         | 179 (2.22)      | 457 (4.14)      | 980 (8.64)      | 725 (6.74)      | 550 (5.44)      | 1991 (6.28)       | 412 (7.84)      | 486 (6.73)      | 152 (6.14)     | 193 (3.56)      |
| 2005  | 31 (1.60)         | 402 (5.08)      | 1499<br>(13.90) | 3042<br>(26.80) | 2326<br>(21.51) | 1500<br>(14.75) | 5393<br>(16.70)   | 979 (17.92)     | 1306<br>(17.30) | 378<br>(14.75) | 573<br>(10.18)  |
| 2006  | 82 (4.29)         | 650 (8.34)      | 2419<br>(22.96) | 4629<br>(40.90) | 4053<br>(37.27) | 2436<br>(23.84) | 5943<br>(18.10)   | 1485<br>(26.21) | 1415<br>(17.93) | 559<br>(21.08) | 715<br>(12.25)  |
| 2007  | 155<br>(7.98)     | 1289<br>(16.27) | 4483<br>(40.81) | 8338<br>(76.58) | 6739<br>(64.35) | 3897<br>(40.46) | 10,910<br>(34.23) | 1909<br>(33.67) | 2643<br>(33.31) | 806<br>(29.92) | 1435<br>(24.82) |

| Year | Age group (years) |                 |                 |                    |                    |                    |                    |                  |                 |                 |                 |
|------|-------------------|-----------------|-----------------|--------------------|--------------------|--------------------|--------------------|------------------|-----------------|-----------------|-----------------|
|      | <1                | 1-4             | 5-9             | 10-14              | 15-19              | 20-24              | 25-44              | 45-49            | 50-59           | 60-64           | ≥65             |
| 2008 | 71 (3-69)         | 770 (9-91)      | 2550<br>(23-62) | 4879<br>(45-03)    | 4638<br>(44-24)    | 2710<br>(27-97)    | 6862<br>(21-27)    | 1200<br>(20-44)  | 1876<br>(22-66) | 1091<br>(39-06) | 1265<br>(21-14) |
| 2009 | 898<br>(46-97)    | 2220<br>(28-96) | 8505<br>(80-87) | 18 056<br>(167-01) | 19 774<br>(188-75) | 13 482<br>(138-43) | 36,755<br>(112-63) | 6229<br>(102-70) | 8405<br>(97-30) | 2256<br>(77-82) | 4069<br>(65-69) |
| 2010 | 367<br>(19-33)    | 962<br>(12-67)  | 3047<br>(29-97) | 5674<br>(52-39)    | 6114<br>(58-49)    | 4338<br>(44-32)    | 10,051<br>(30-48)  | 1704<br>(27-24)  | 2423<br>(26-89) | 692<br>(22-98)  | 1368<br>(21-33) |
| 2011 | 218<br>(11-6)     | 443<br>(5-9)    | 1167<br>(11-9)  | 2161<br>(19-9)     | 2573<br>(24-7)     | 1800<br>(18-3)     | 4470<br>(13-4)     | 691<br>(10-7)    | 1065<br>(11-3)  | 321<br>(10-3)   | 515<br>(7-8)    |

Mexican public health data [19] except \*Navarette, 2002 [29]
